# Supplementary material
Source: PubMed Central journal article supplement (PMC4249150)
Supplement: JVI.01900-14_zjv999099807so1.pdf [file JVI.01900-14_zjv999099807so1.pdf]

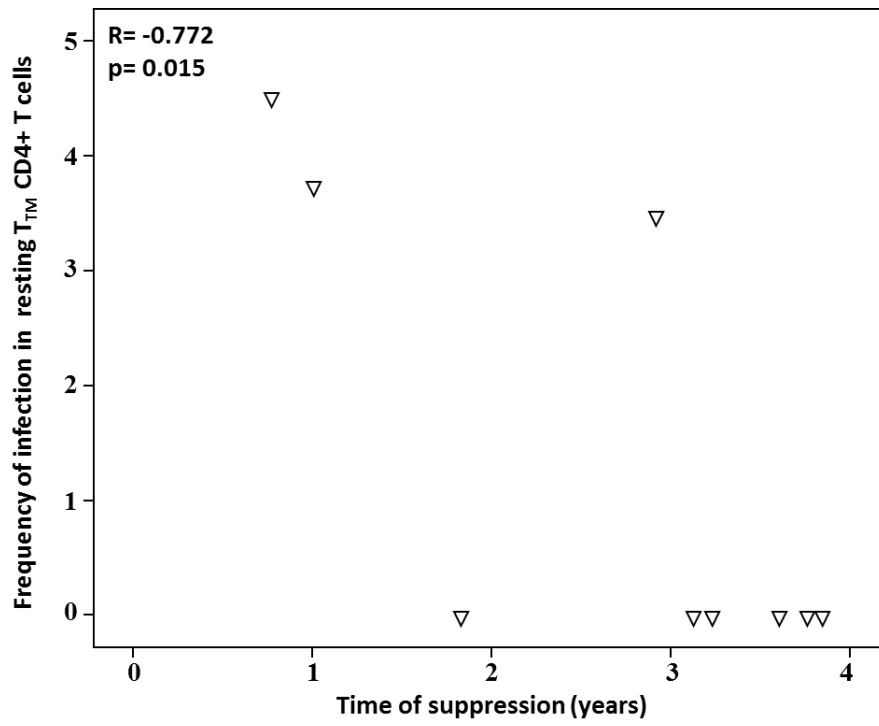

**Supplemental figure.** Inverse correlation between the frequency of infection in T<sub>TM</sub> cells of AHI-treated patients and the time they had been suppressed.
